# Supplementary material for: Two New Antiprotozoal Diterpenes From the Roots of Acacia nilotica
Source: PubMed Central journal article supplement (PMC8097170; doi:10.3389/fchem.2021.624741), 2021-04-21
Supplement: datasheet1.pdf [file datasheet1.pdf]

## Supporting Information

| <b>Table of Contents</b>                                                                                                                                                                                                        |  | <b>Page</b> |
|---------------------------------------------------------------------------------------------------------------------------------------------------------------------------------------------------------------------------------|--|-------------|
| <b>Figure S1:</b> HR-EIMS spectrum of compound <b>1</b> [M-H] <sup>-</sup> ion at $m/z = 319.2229$                                                                                                                              |  | 2           |
| <b>Figure S2:</b> <sup>1</sup> H-NMR (500 MHz, CDCl <sub>3</sub> ) Spectrum of compound <b>1</b>                                                                                                                                |  | 3           |
| <b>Figure S3:</b> <sup>1</sup> H-NMR (500 MHz, CDCl <sub>3</sub> ) Spectrum of compound <b>1</b> (From $\delta_{\text{H}}$ 3.1 ppm to $\delta_{\text{H}}$ 4.7 ppm)                                                              |  | 4           |
| <b>Figure S4:</b> <sup>1</sup> H-NMR (500 MHz, CDCl <sub>3</sub> ) Spectrum of compound <b>1</b> (From $\delta_{\text{H}}$ 6.6 ppm to $\delta_{\text{H}}$ 7.0 ppm)                                                              |  | 5           |
| <b>Figure S5:</b> <sup>1</sup> H-NMR (500 MHz, CDCl <sub>3</sub> ) Spectrum of compound <b>1</b> (From $\delta_{\text{H}}$ 0.69 ppm to $\delta_{\text{H}}$ 0.87 ppm)                                                            |  | 6           |
| <b>Figure S6:</b> DEPTq135 (100 MHz, CDCl <sub>3</sub> ) Spectrum of compound <b>1</b> (From $\delta_{\text{C}}$ 50 ppm to $\delta_{\text{C}}$ 200 ppm )                                                                        |  | 7           |
| <b>Figure S7:</b> DEPTq135 (100 MHz, CDCl <sub>3</sub> ) Spectrum of compound <b>1</b> (From $\delta_{\text{C}}$ 11 ppm to $\delta_{\text{C}}$ 47 ppm)                                                                          |  | 8           |
| <b>Figure S8:</b> HMBC Spectrum of compound <b>1</b>                                                                                                                                                                            |  |             |
| <b>Figure S9:</b> HMBC Spectrum of compound <b>1</b> (From $\delta_{\text{H}}$ 3.50 ppm to $\delta_{\text{H}}$ 0.70 ppm)<br>HMBC Spectrum of compound <b>1</b> (From $\delta_{\text{C}}$ 15 ppm to $\delta_{\text{C}}$ 55 ppm ) |  | 10          |
| <b>Figure S10:</b> NOESY Spectrum of compound <b>1</b>                                                                                                                                                                          |  | 11          |
| <b>Figure S11:</b> COSY Spectrum of compound <b>1</b>                                                                                                                                                                           |  | 12          |
| <b>Figure S12:</b> HR-EIMS spectrum LC-MS spectrum of compound <b>2</b> at $m/z = 318.2195$                                                                                                                                     |  | 13          |
| <b>Figure S13:</b> <sup>1</sup> H NMR spectrum of compound <b>2</b>                                                                                                                                                             |  | 14          |
| <b>Figure S14:</b> <sup>1</sup> H NMR spectrum of compound <b>2</b> (annotated)                                                                                                                                                 |  | 15          |
| <b>Figure S15:</b> <sup>13</sup> C DEPTq-135 spectrum of compound <b>2</b>                                                                                                                                                      |  | 16          |
| <b>Figure S16:</b> HMBC Spectrum of compound <b>2</b>                                                                                                                                                                           |  | 17          |
| <b>Figure S17:</b> COSY Spectrum of compound <b>2</b>                                                                                                                                                                           |  | 18          |
| <b>Figure S18:</b> HSQC Spectrum of compound <b>2</b>                                                                                                                                                                           |  |             |



[ Mass Spectrum ]

Date : 121219 - Da Kuning - HEAN.10.B (VIAL 7) - 001 Date : 12-Dec-2019 08:51

Instrument : JEOL.MStation JMS-700(2)

Sample :

Note :

Inlet : Direct Ion Mode : EI+

Spectrum Type : Normal Ion [MF-Lines]

RT : 0.37 min Scan# : (419) Time : 226.7 deg.C

BP : m/z 83.0403 Int. : 1930.81 (1919.465)

Output m/z range : 144 to 324 Cut Level : 0.00 %

[ Theoretical Ion Distribution ]

Molecular Formula : C20 H30 O3

(m/z 318.2195, MW 318.4564, D.S. 6.0)

Base Peak : 318.2195, Averaged MW : 318.4534(a), 318.4542(w)

| m/z      | INT.          |
|----------|---------------|
| 318.2195 | 100.0000***** |
| 319.2229 | 22.3590*****  |
| 320.2257 | 2.9773**      |
| 321.2284 | 0.2938        |
| 322.2311 | 0.0230        |
| 323.2338 | 0.0015        |

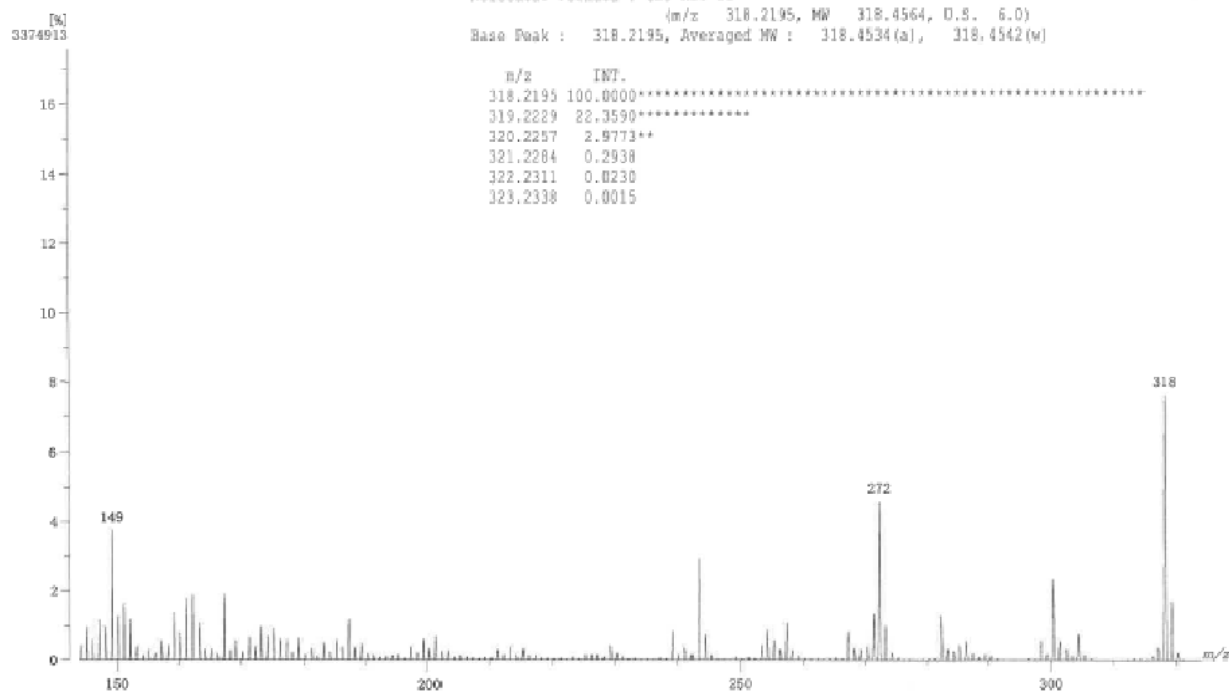

Figure S1: HR-EIMS spectrum of compound **1** [M-H]<sup>-</sup> ion at  $m/z = 319.2229$

IG-JA-PAN76.10.fid  
IG-JA-PAN76  
PROTON.NIGHT CDCl3 {C:\Bruker\TopSpin3.2} DDU500 22

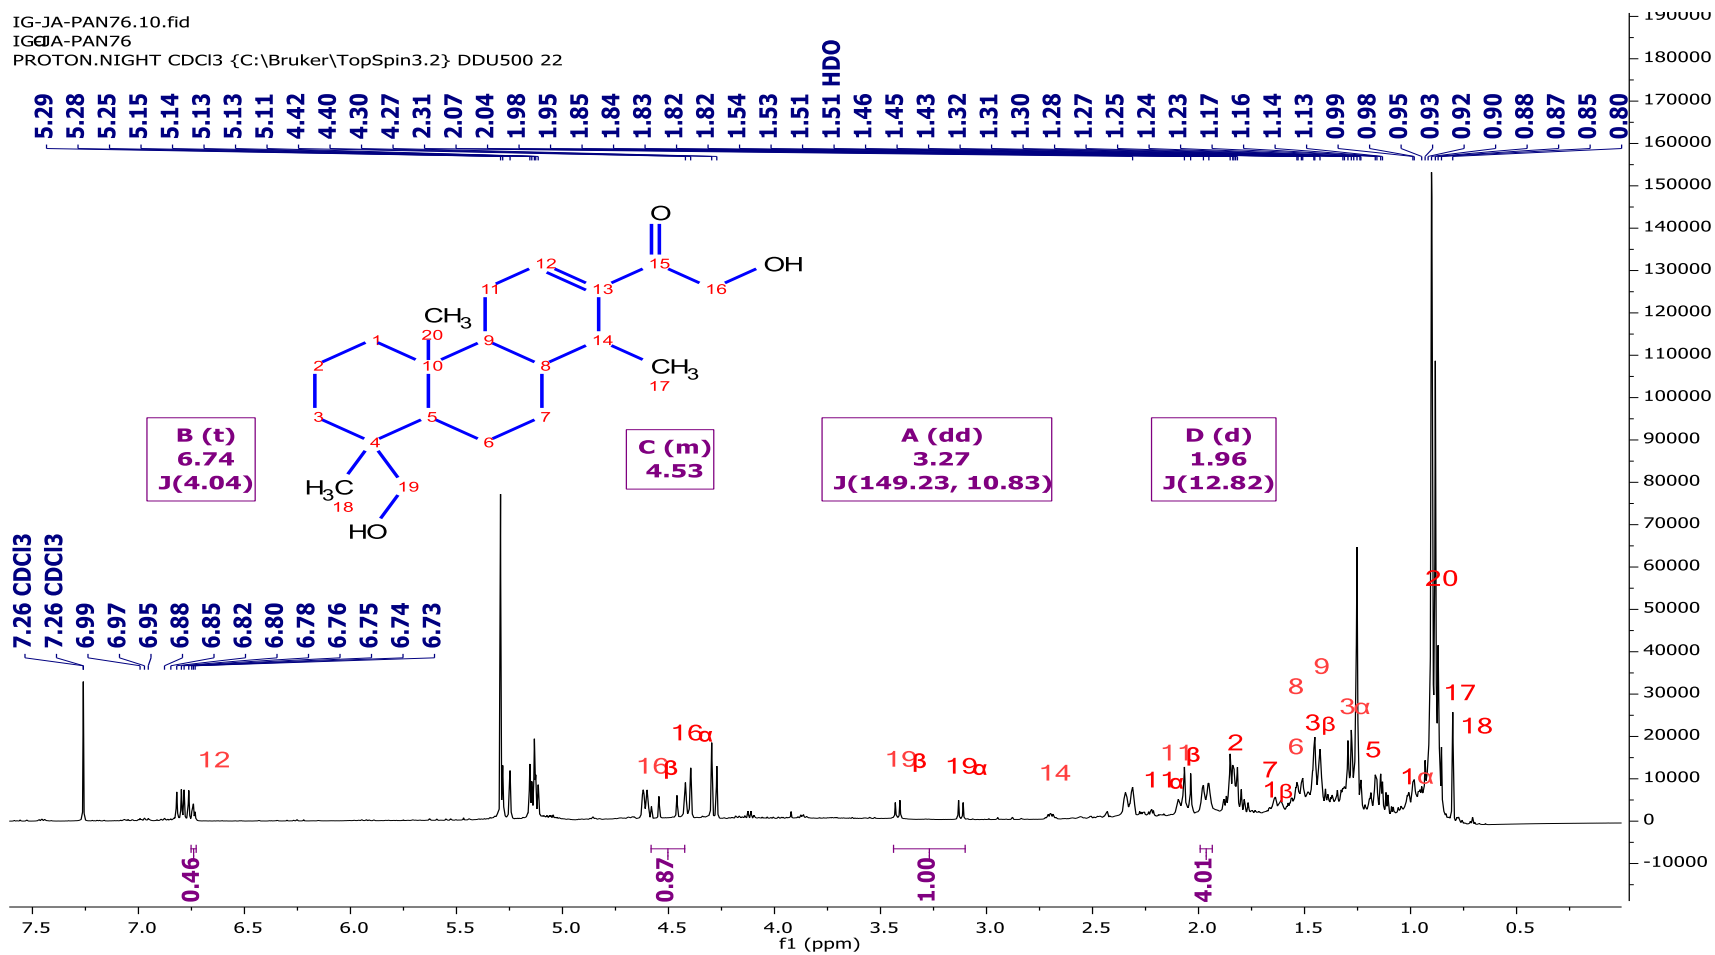

Figure S2: <sup>1</sup>H-NMR (400 MHz, CDCl<sub>3</sub>) Spectrum of compound 1

IG-JA-PAN76.10.fid  
IG-JA-PAN76  
PROTON.NIGHT CDCl3 {C:\Bruker\TopSpin3.2} DDU500 22

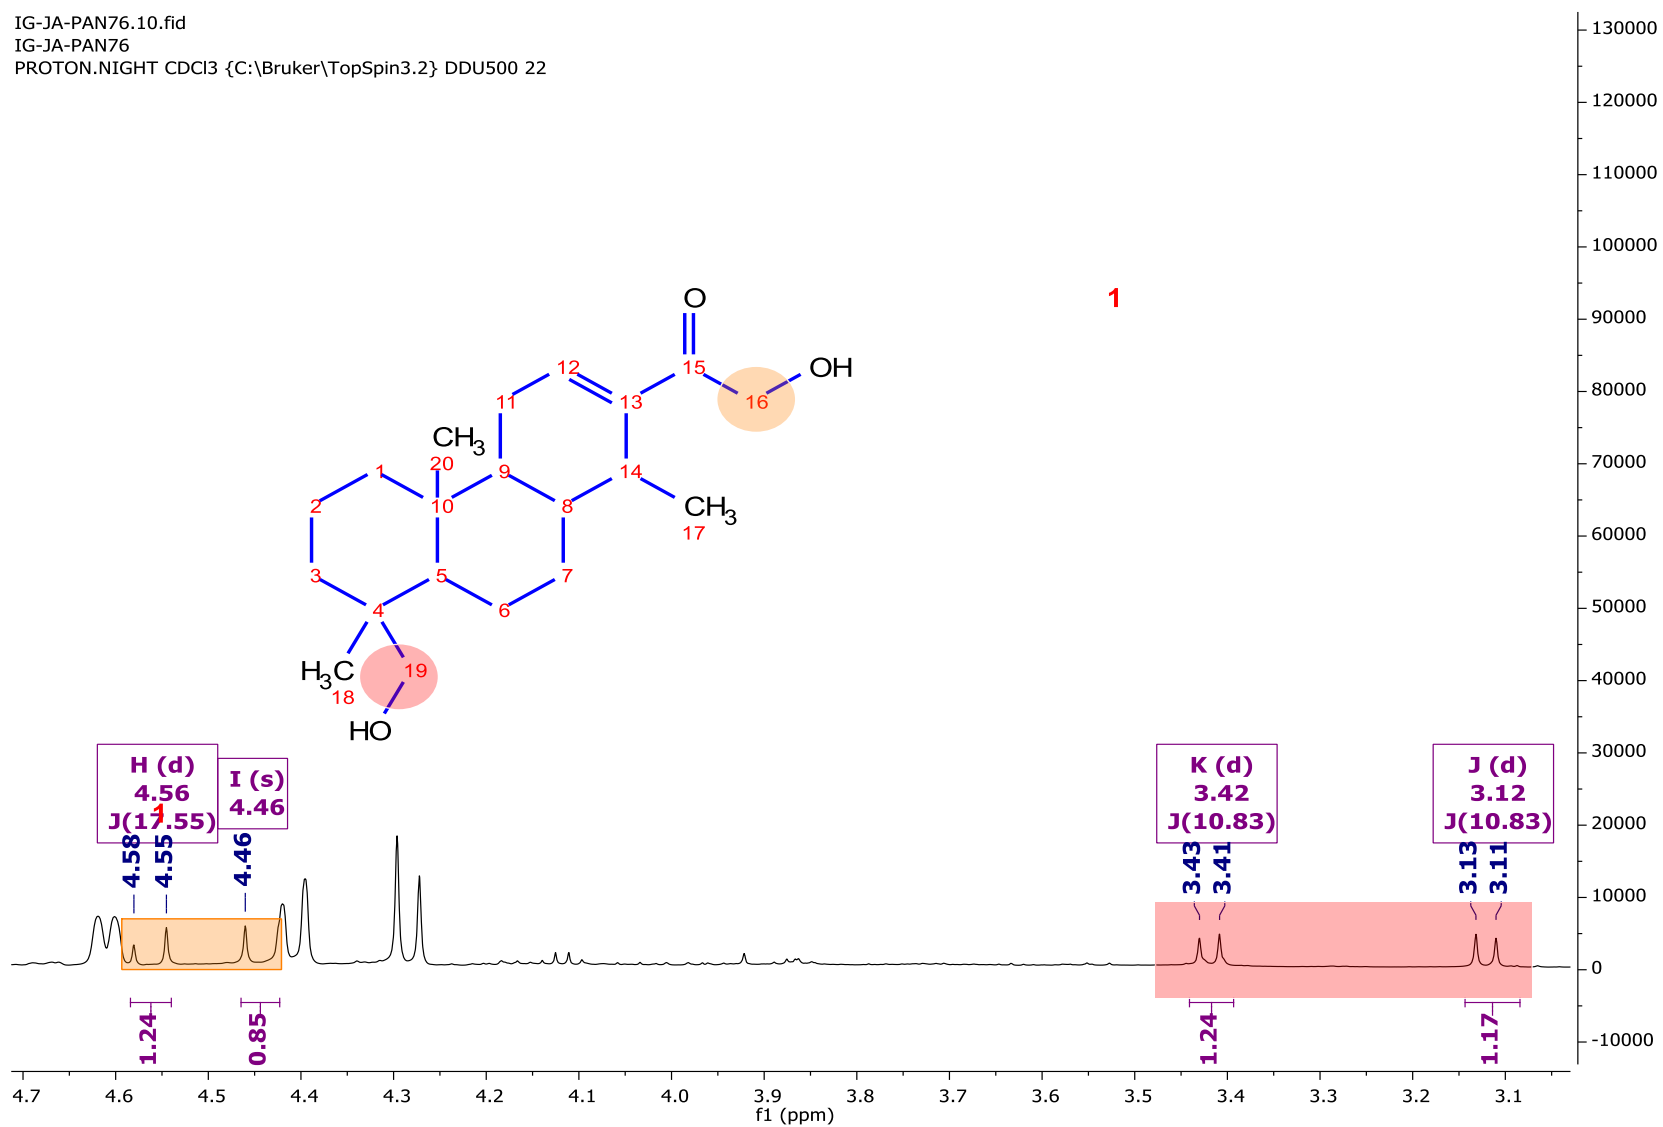

Figure S3: <sup>1</sup>H-NMR (400 MHz, CDCl<sub>3</sub>) Spectrum of compound 1 (From  $\delta_{\text{H}}$  3.1 ppm to  $\delta_{\text{H}}$  4.7 ppm)

IG-JA-PAN76.10.fid  
IG-JA-PAN76  
PROTON.NIGHT CDCl3 {C:\Bruker\TopSpin3.2} DDU500 22

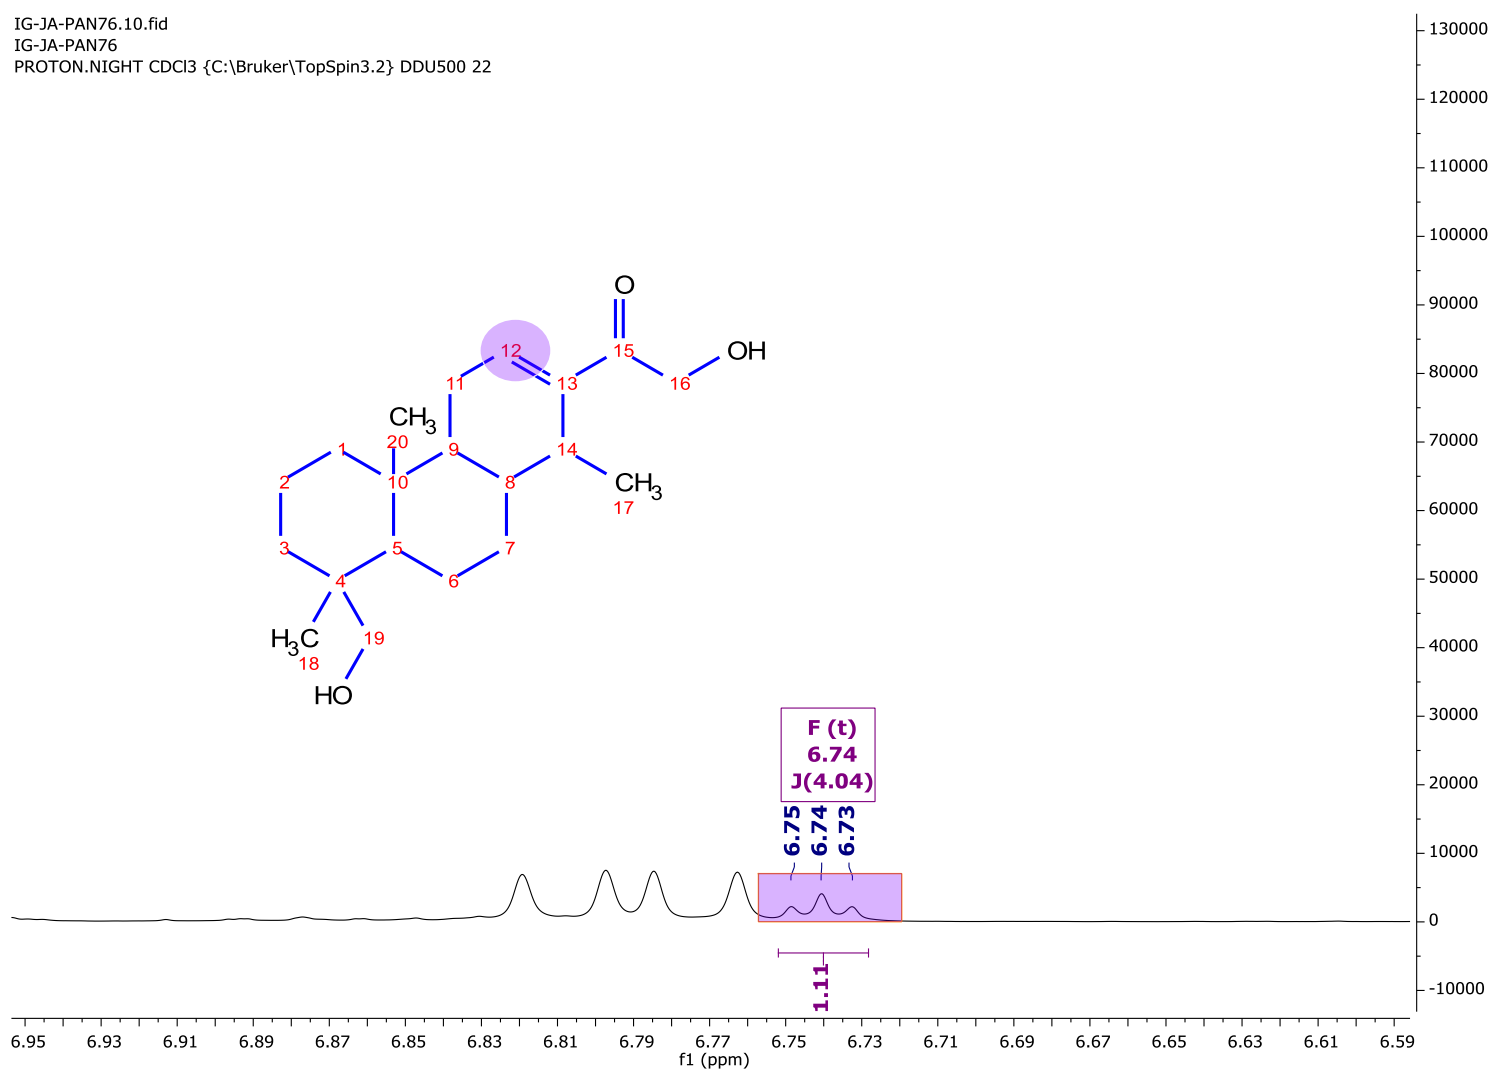

**Figure S4:** <sup>1</sup>H-NMR (400 MHz, CDCl<sub>3</sub>) Spectrum of compound 1 (From  $\delta_{\text{H}}$ 6.6 ppm to  $\delta_{\text{H}}$  7.0 ppm)

IG-JA-PAN76.10.fid  
IG-JA-PAN76  
PROTON.NIGHT CDCl3 {C:\Bruker\TopSpin3.2} DDU500 22

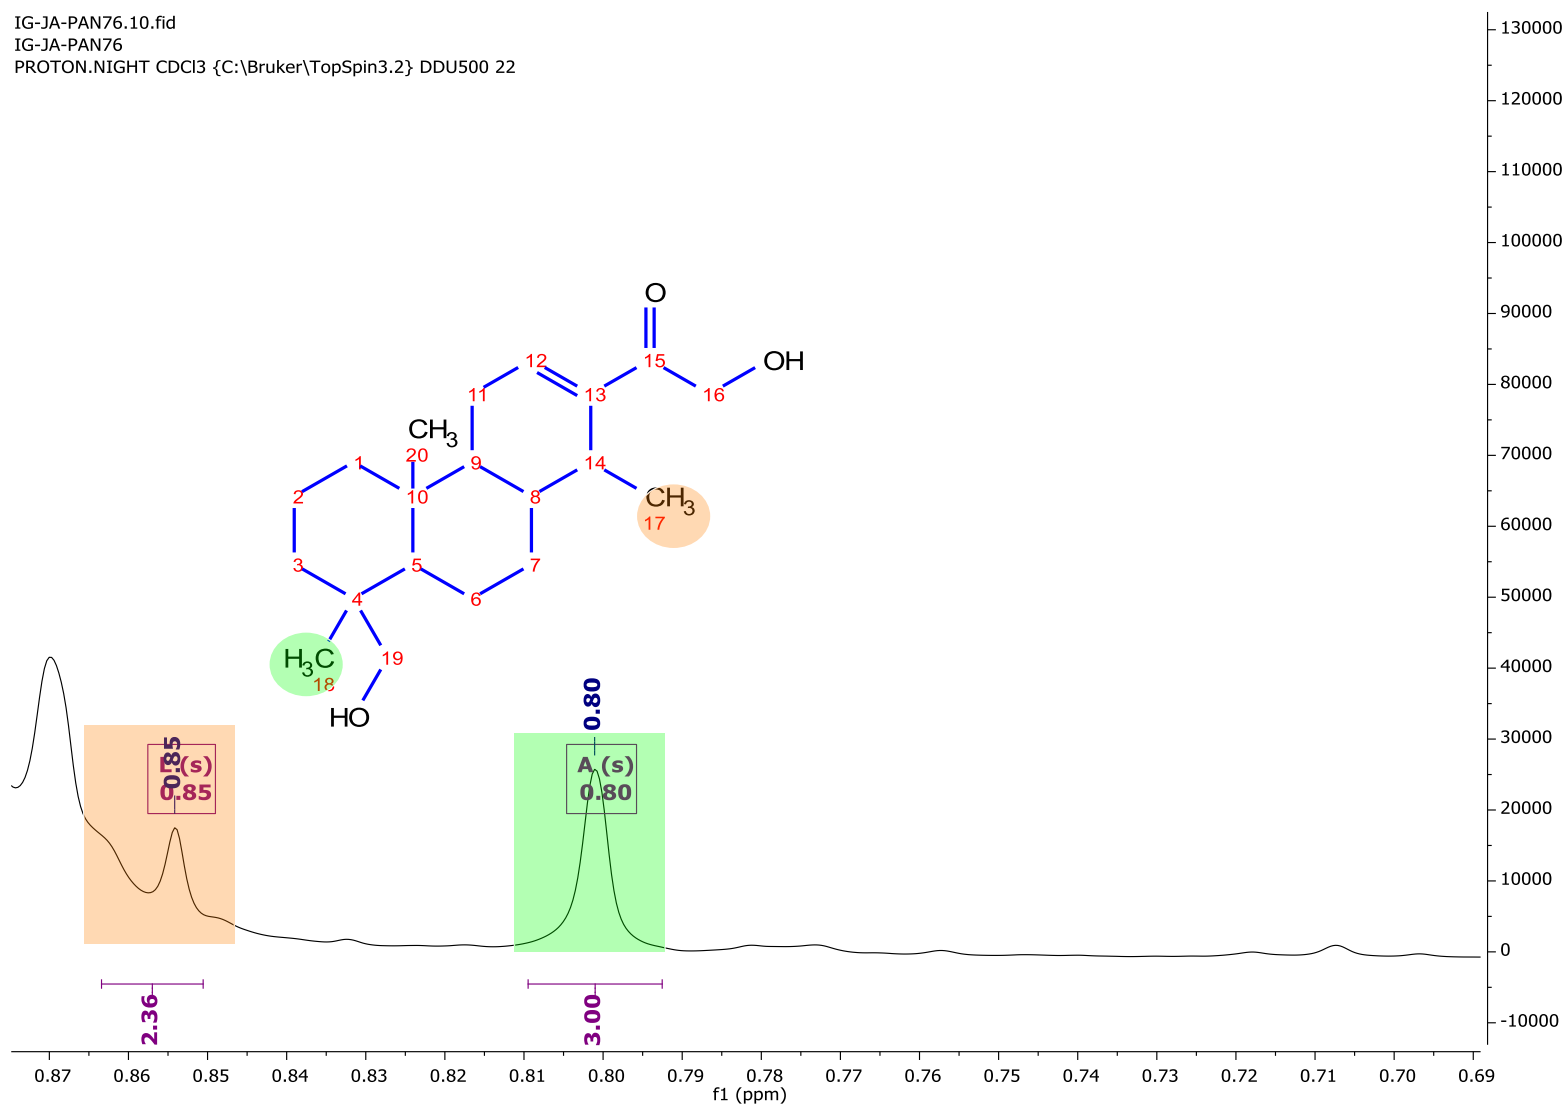

**Figure S5:** <sup>1</sup>H-NMR (400 MHz, CDCl<sub>3</sub>) Spectrum of compound 1 (From  $\delta_H$  0.69 ppm to  $\delta_H$  0.87 ppm)

IG-JA-PAN76.11.fid  
IG-JA-PAN76  
DEPTQ\_NIGHT CDCl3 {C:\Bruker\TopSpin3.2} DDU500 22

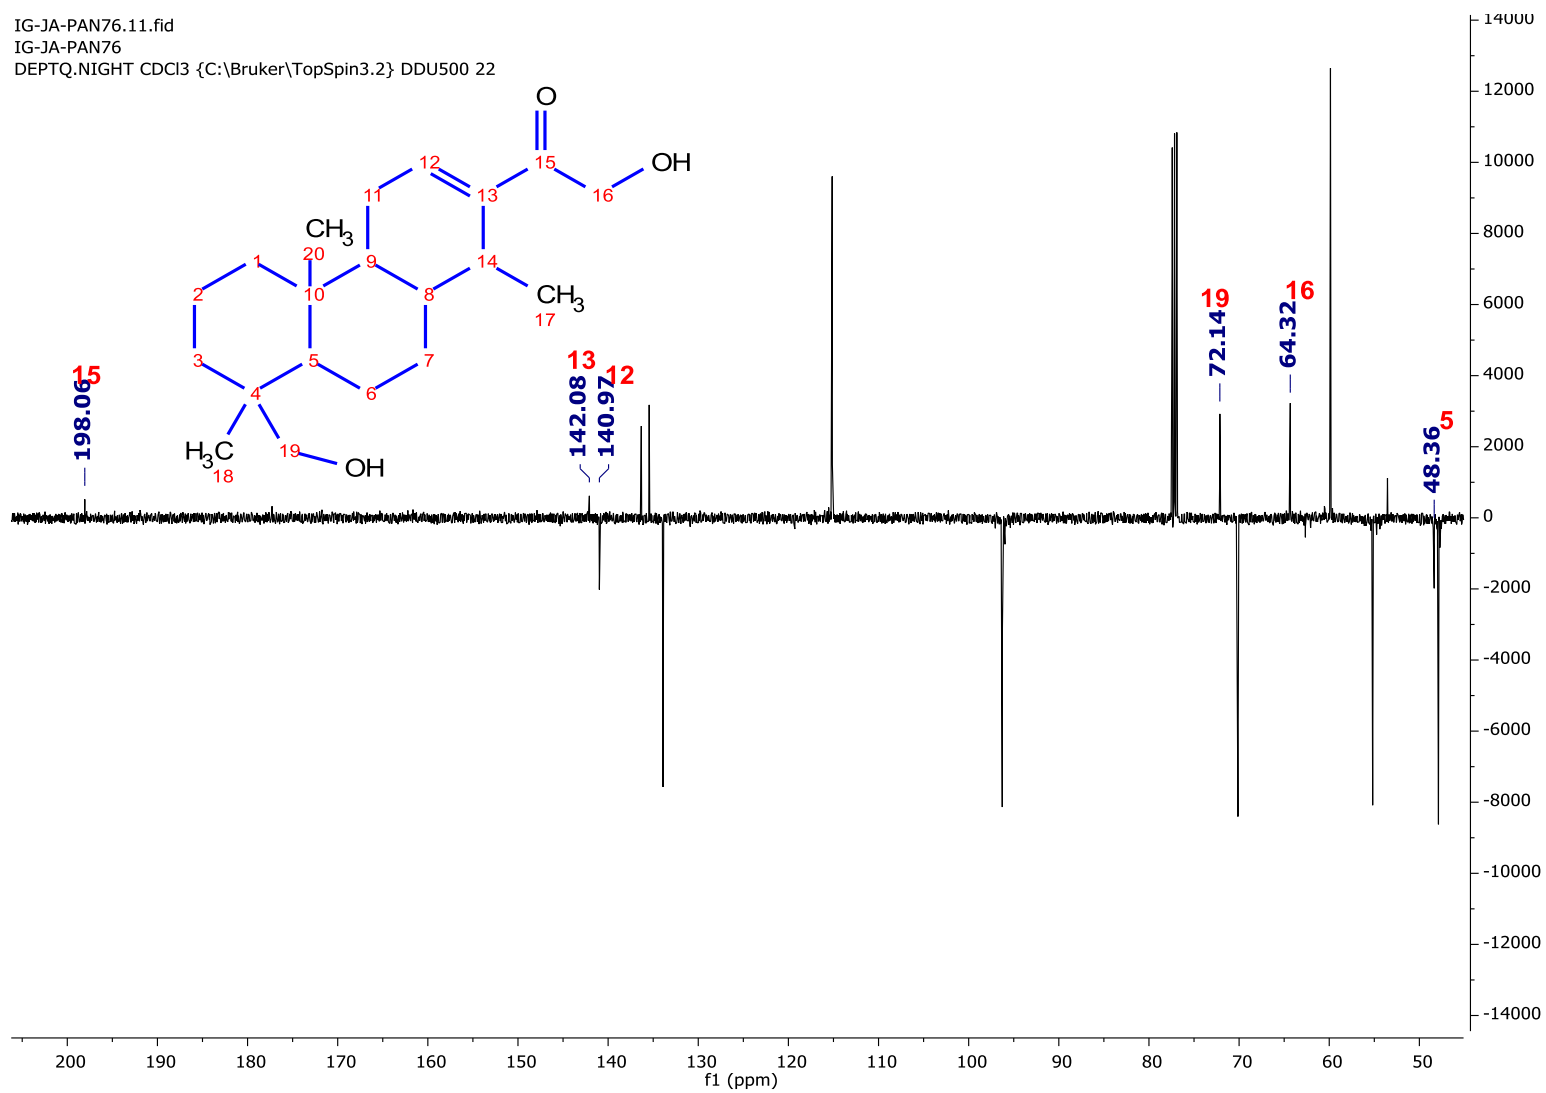

Figure S6: DEPTq135 (100 MHz, CDCl<sub>3</sub>) Spectrum of compound 1 (From  $\delta_C$  50 ppm to  $\delta_C$  200 ppm)



IG-JA-PAN76.11.fid  
IG-JA-PAN76  
DEPTQ.NIGHT CDCl3 {C:\Bruker\TopSpin3.2} DDU500 22

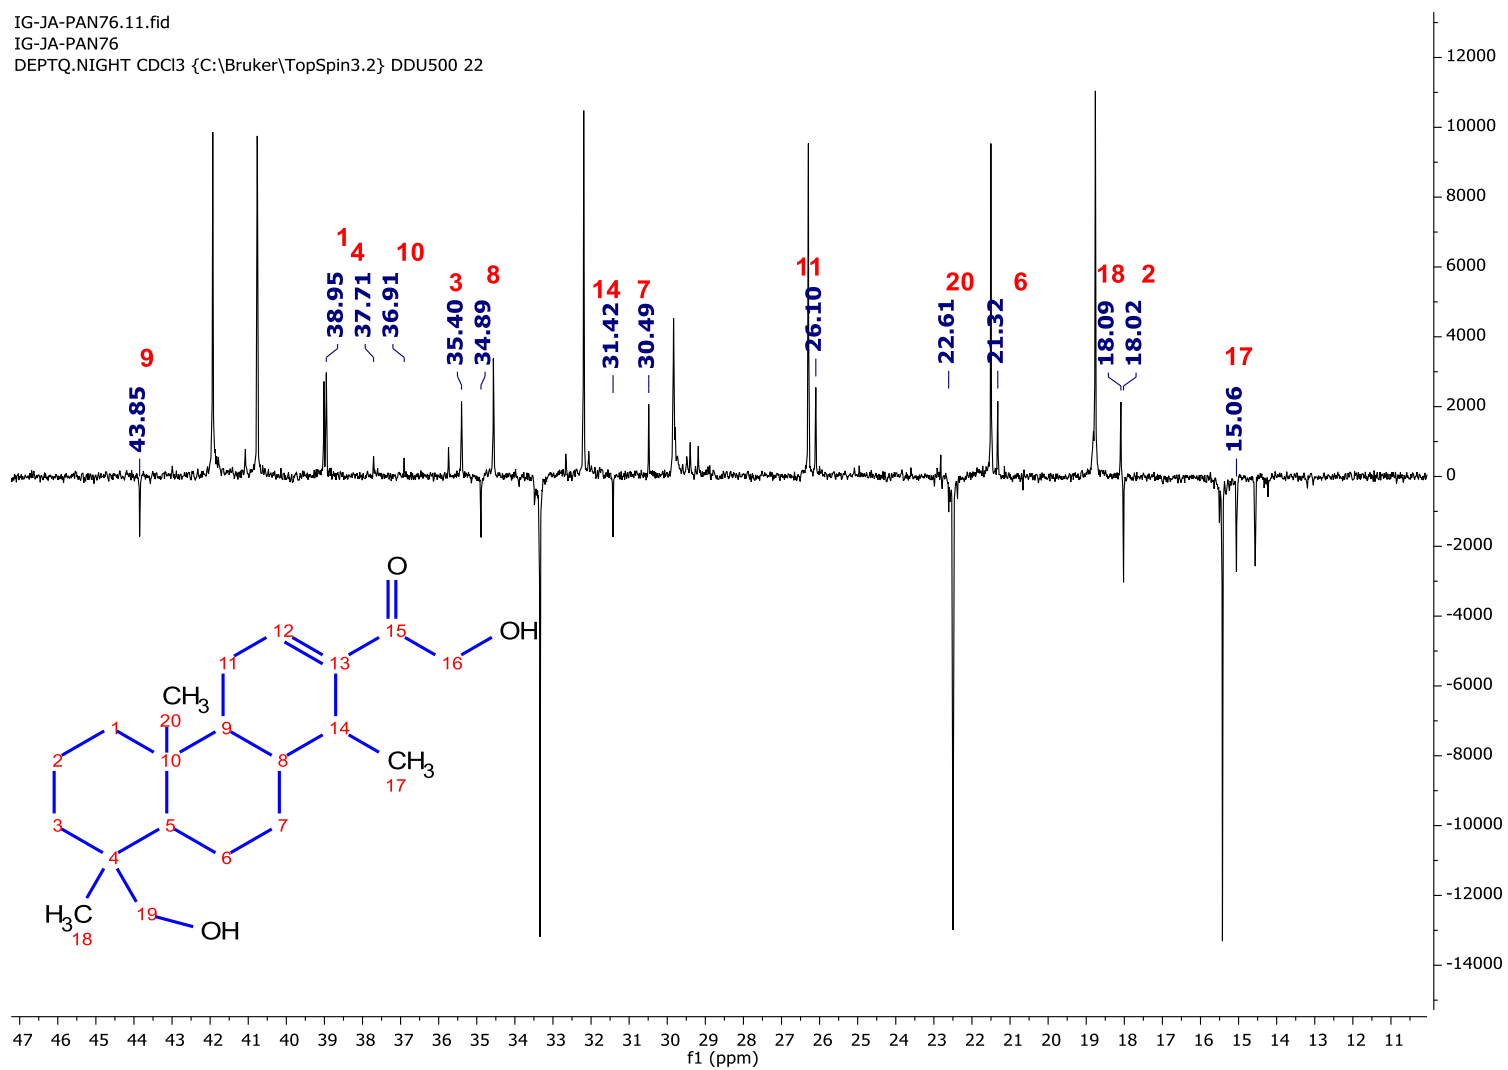

Figure S7: DEPTq135 (100 MHz, CDCl<sub>3</sub>) Spectrum of compound 1 (From  $\delta_c$  11 ppm to  $\delta_c$  47 ppm)

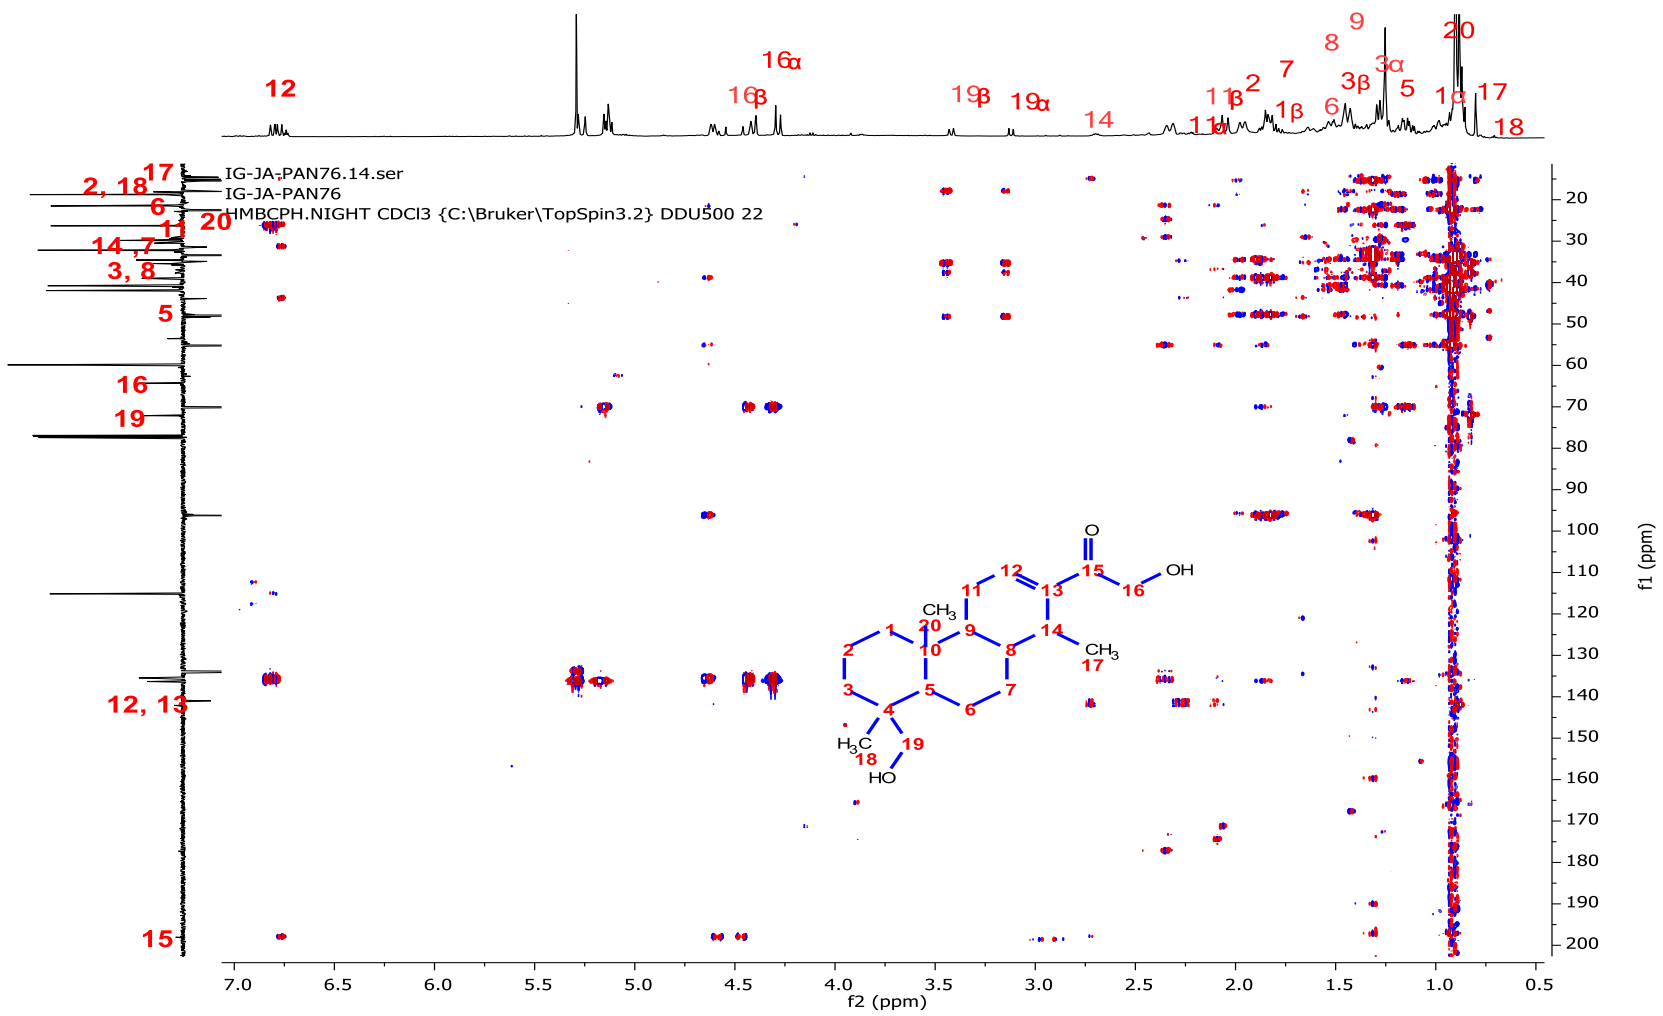

Figure S8: HMBC Spectrum of compound 1

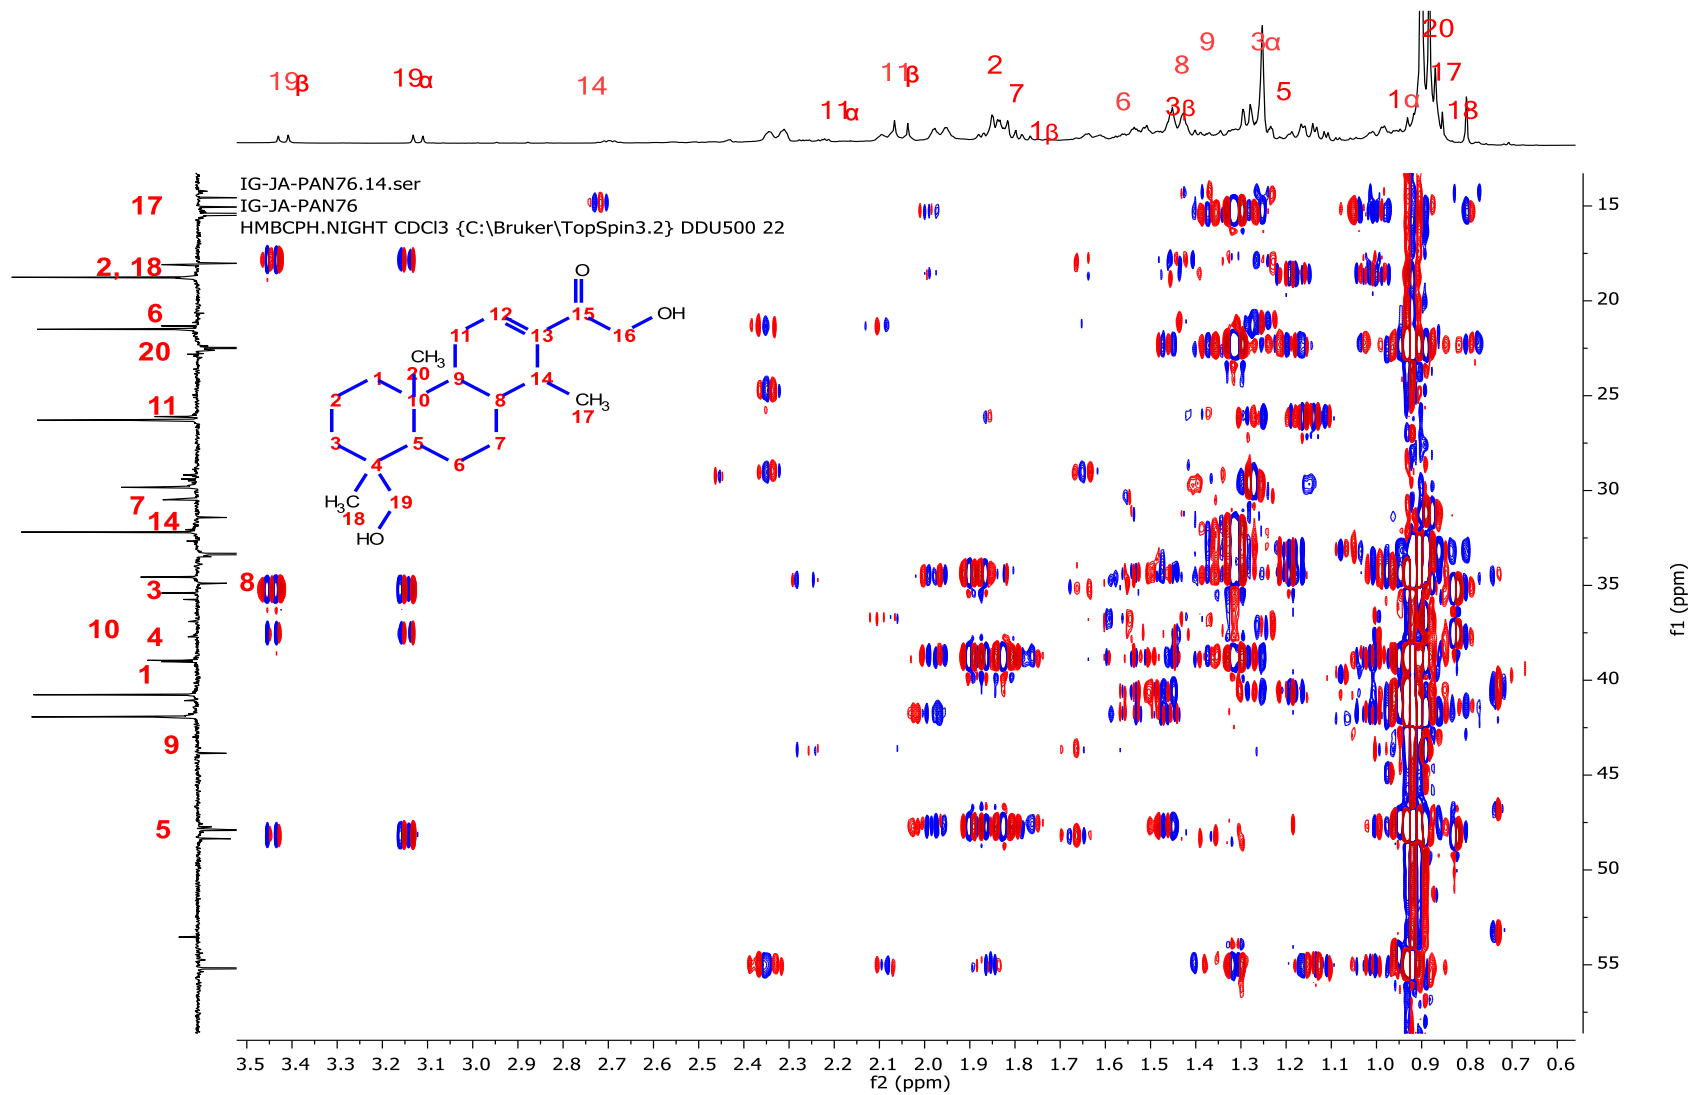

Figure S9: HMBC Spectrum of compound 1 (From  $\delta_H$  3.50 ppm to  $\delta_H$  0.70 ppm)/( $\delta_C$  15 ppm to  $\delta_C$  55 ppm )

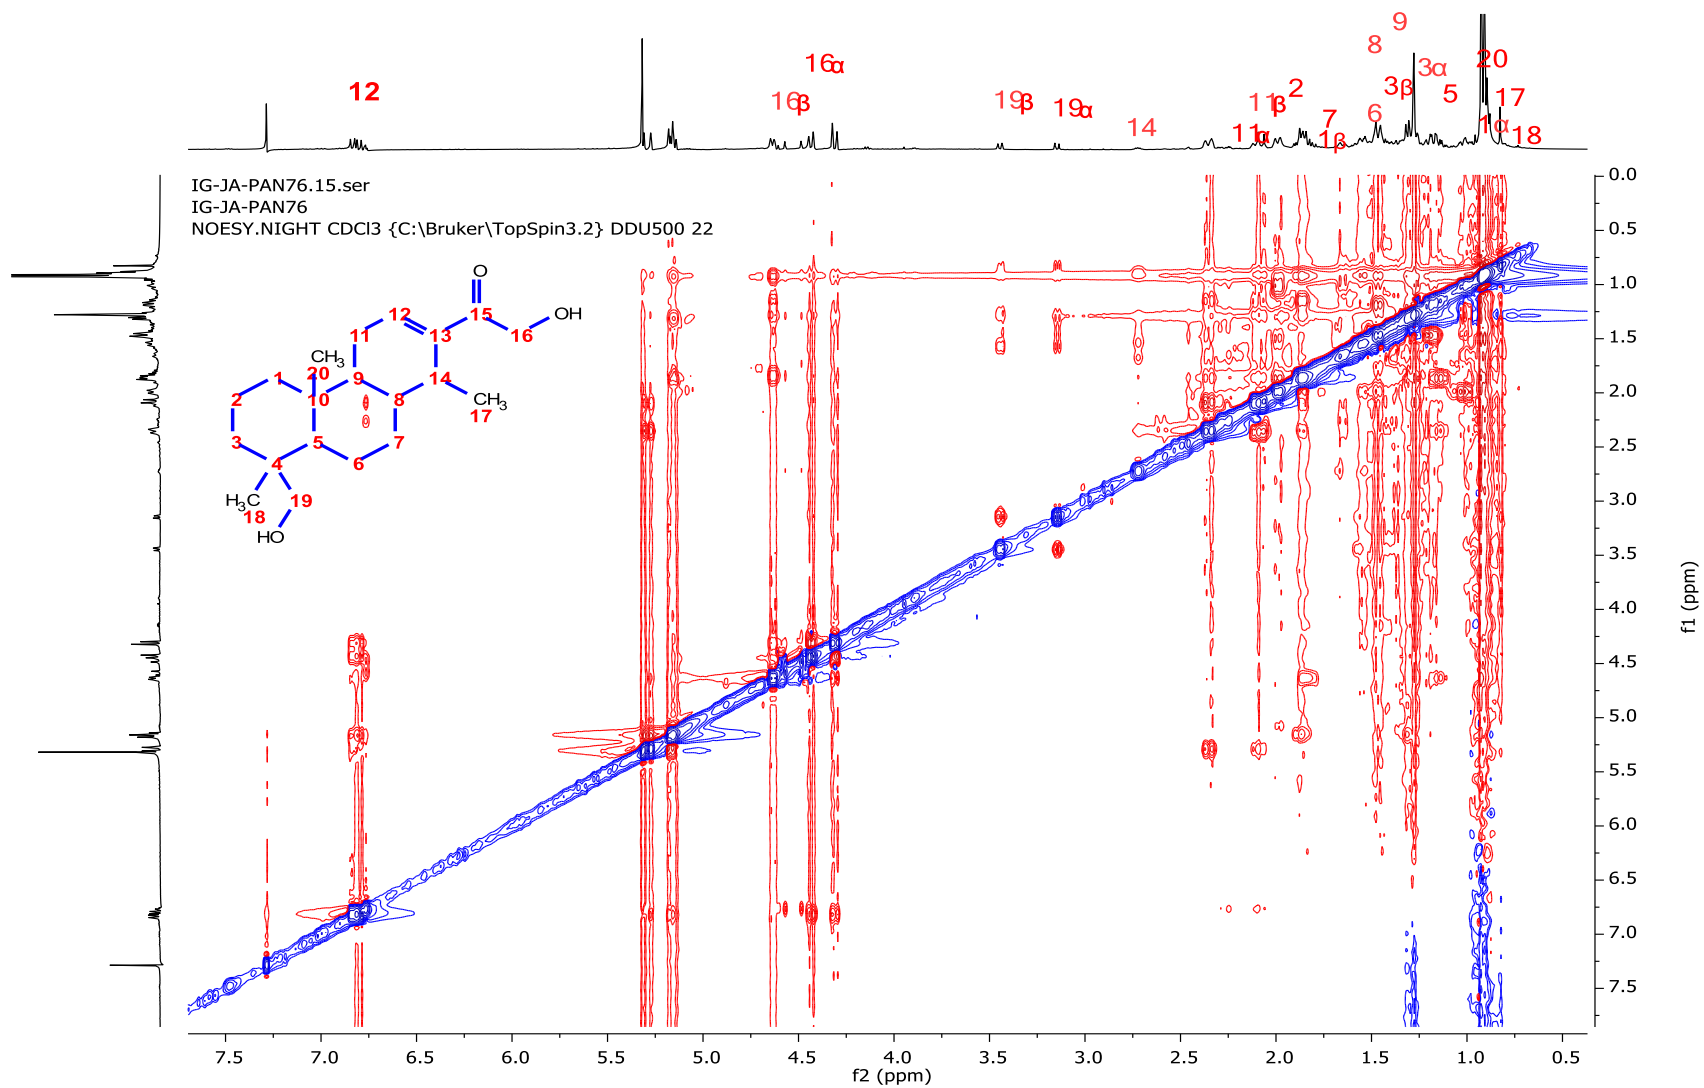

Figure S10: NOESY Spectrum of compound 1

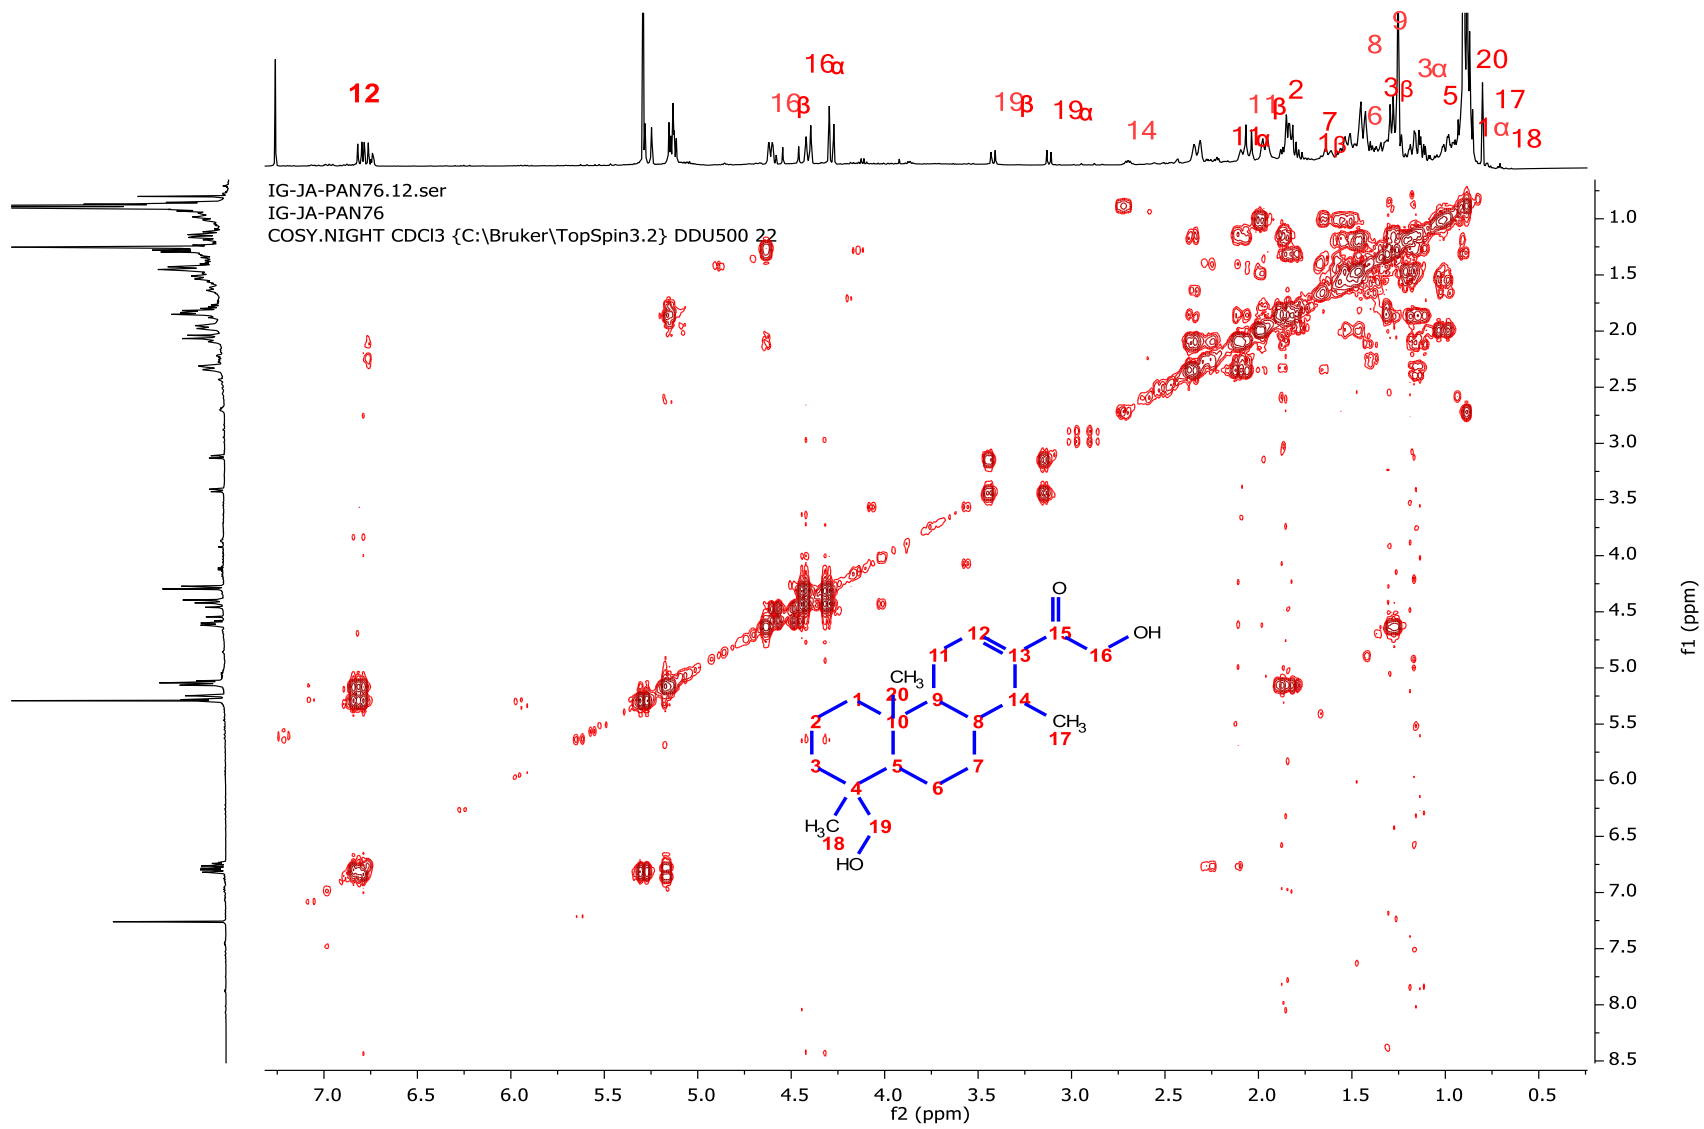

Figure S11: COSY Spectrum of compound 1

[ Mass Spectrum ]  
Data : 171219 - HEAL19 - 001 Date : 17-Dec-2019 07:11  
Instrument : JEOL MSStation JMS-1002J  
Sample :  
Note :  
Inlet : Direct Ion Mode : EI+  
Spectrum Type : Normal Ion [MP-Linear]  
RT : 0.74 min Scan#: (7,14) Temp : 3276.7 degC  
BP : m/z 134.1644 Int : 1768.82 (18547440)  
Output m/z range : 50 to 454 Cut Level : 0.00 %

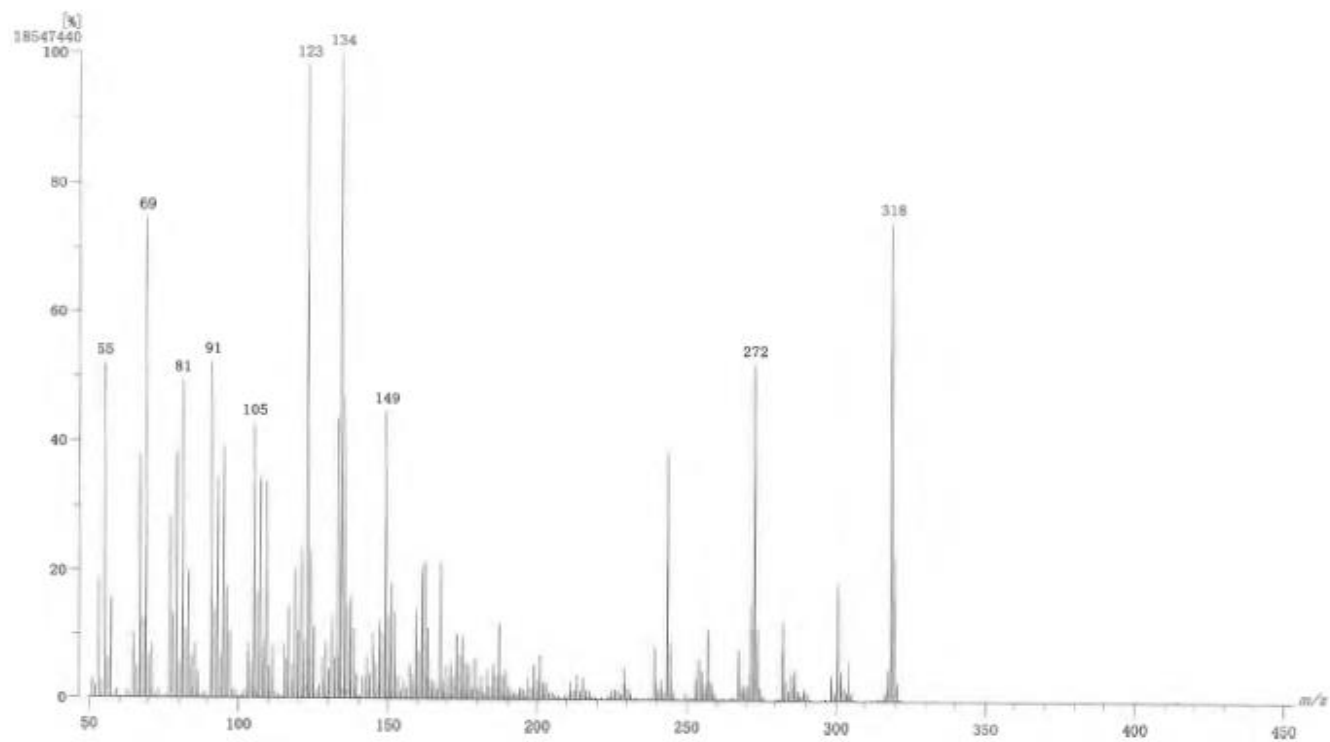

**Figure S12:** HR-EIMS spectrum of compound **2** at  $m/z = 318.2195$



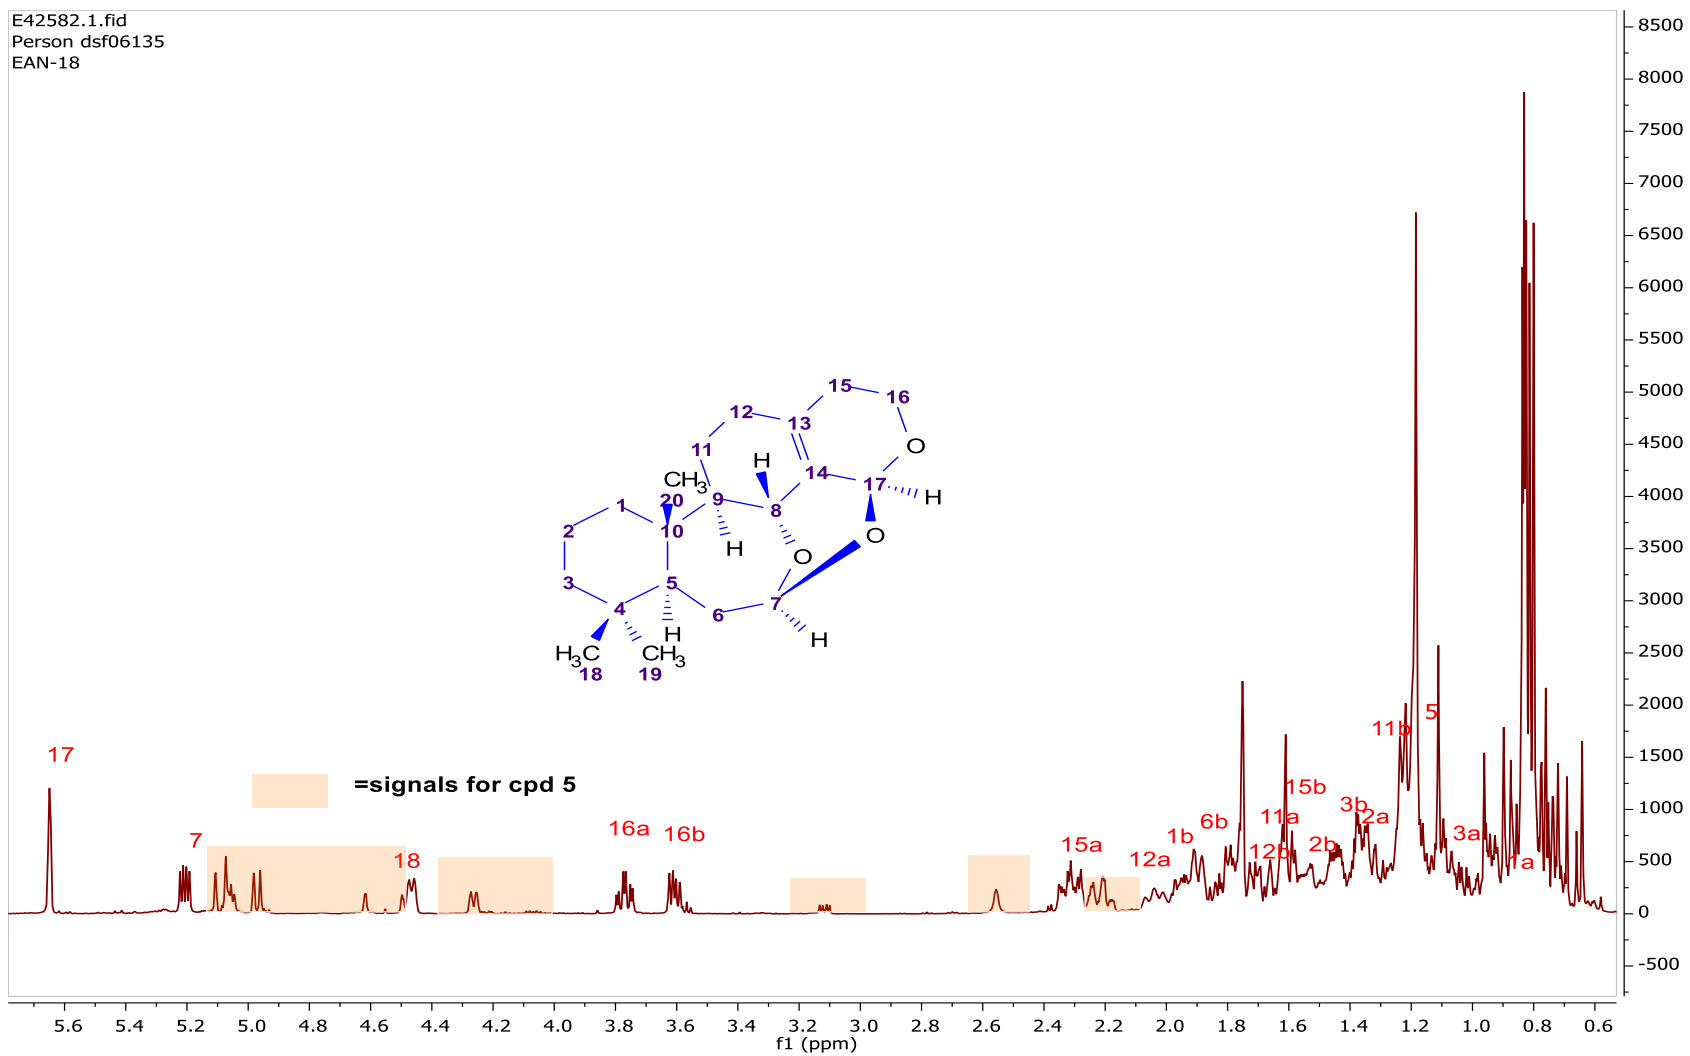

**Figure S14:** <sup>1</sup>H NMR Spectrum of compound 2 (annotated).



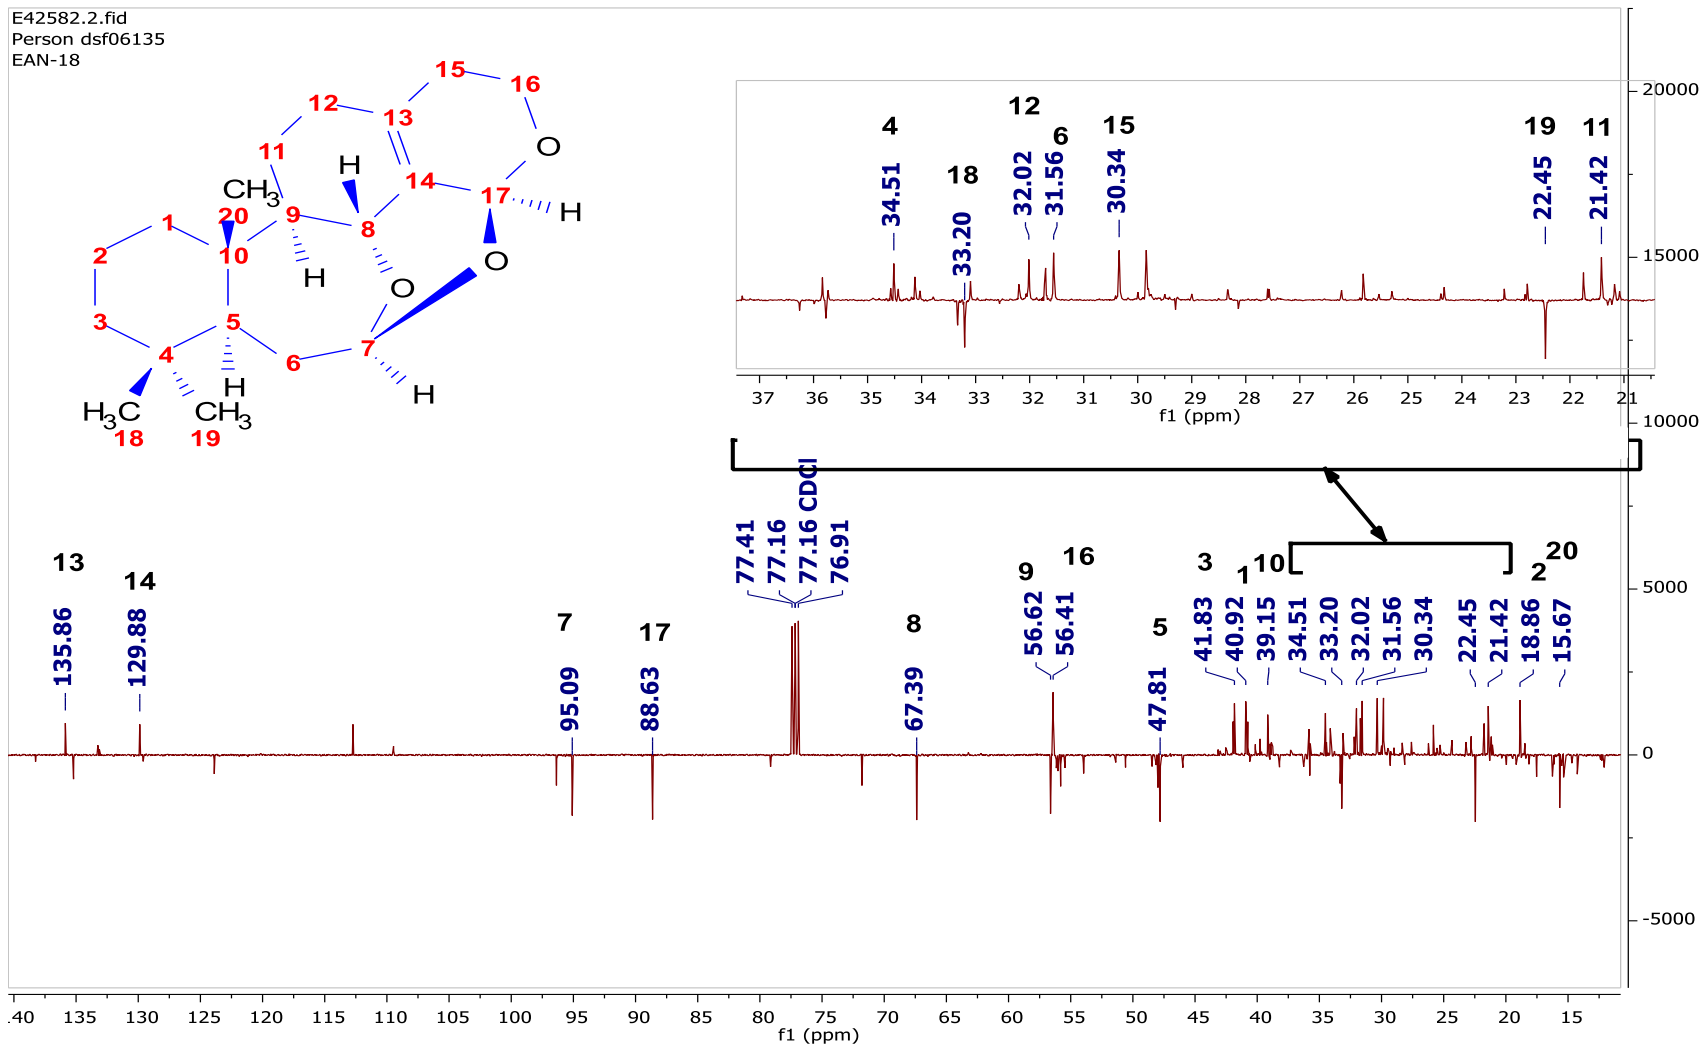

Figure S15: <sup>13</sup>C DEPTq-135 Spectrum of compound 2

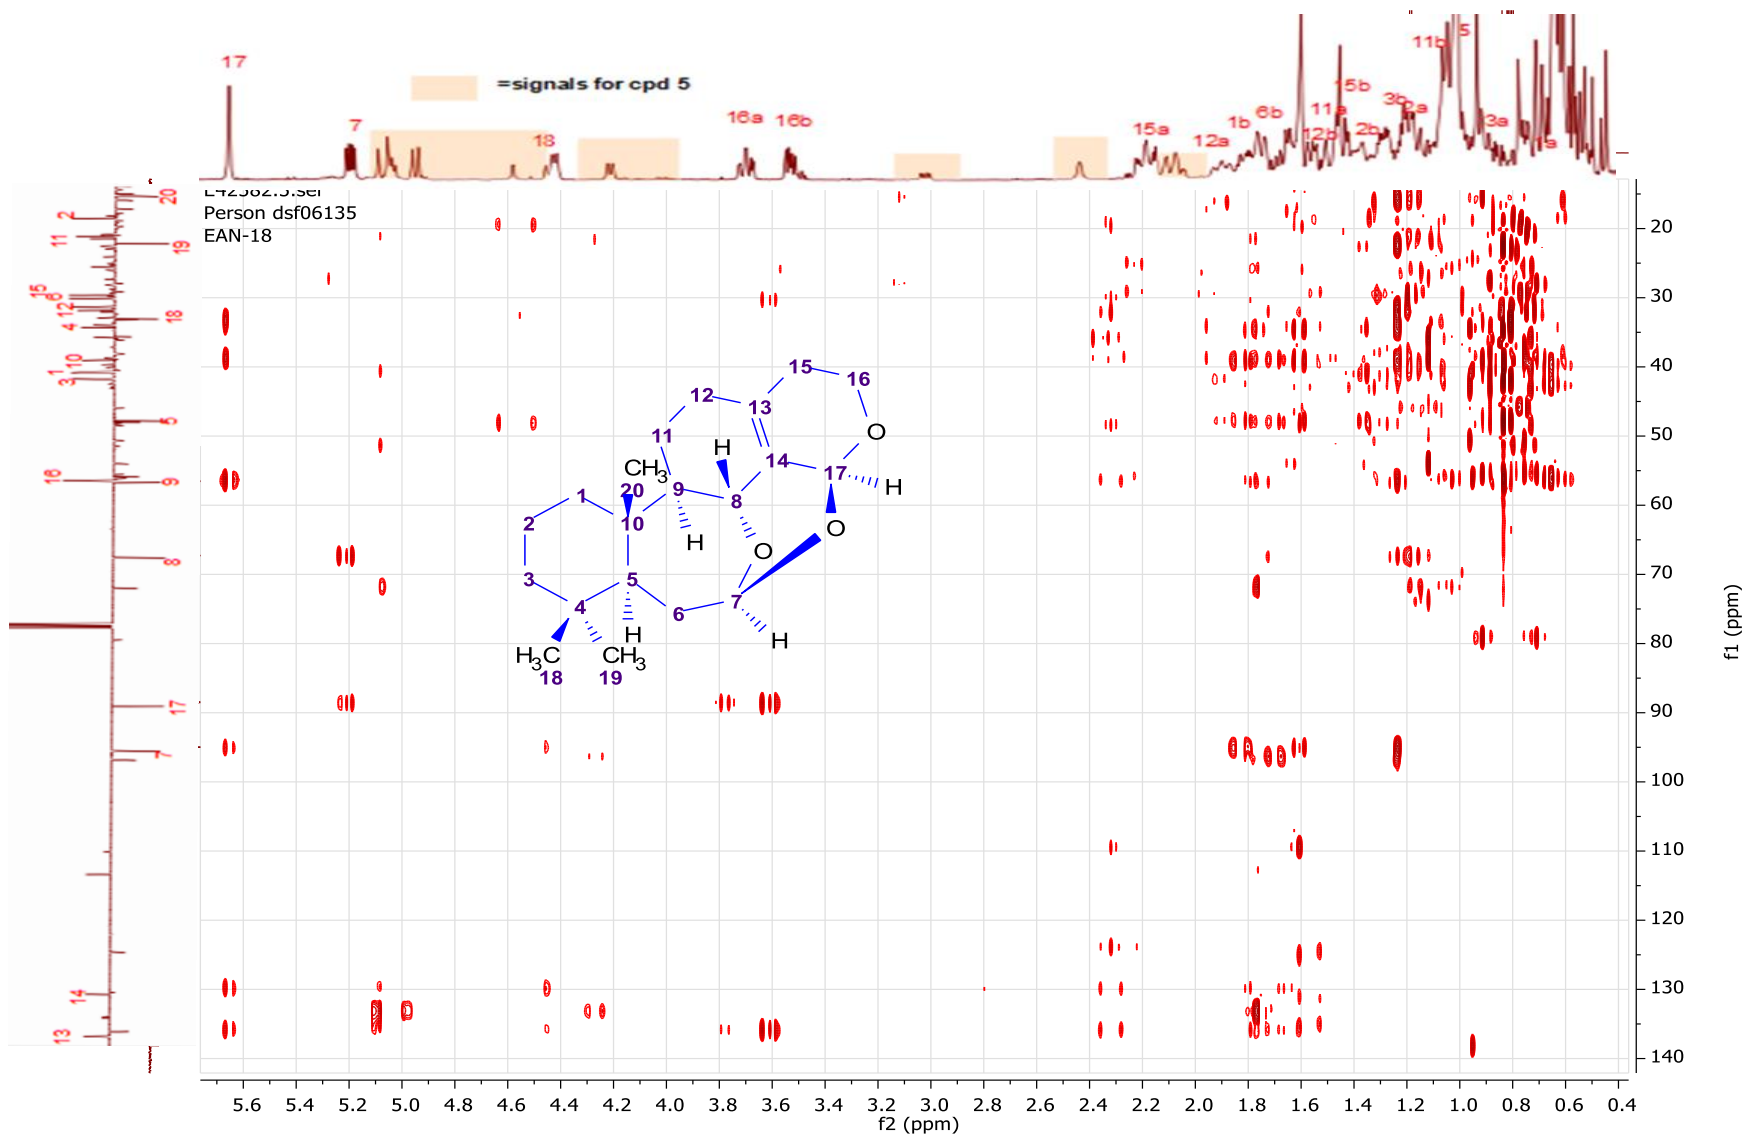

Figure S16: HMBC Spectrum of compound 2

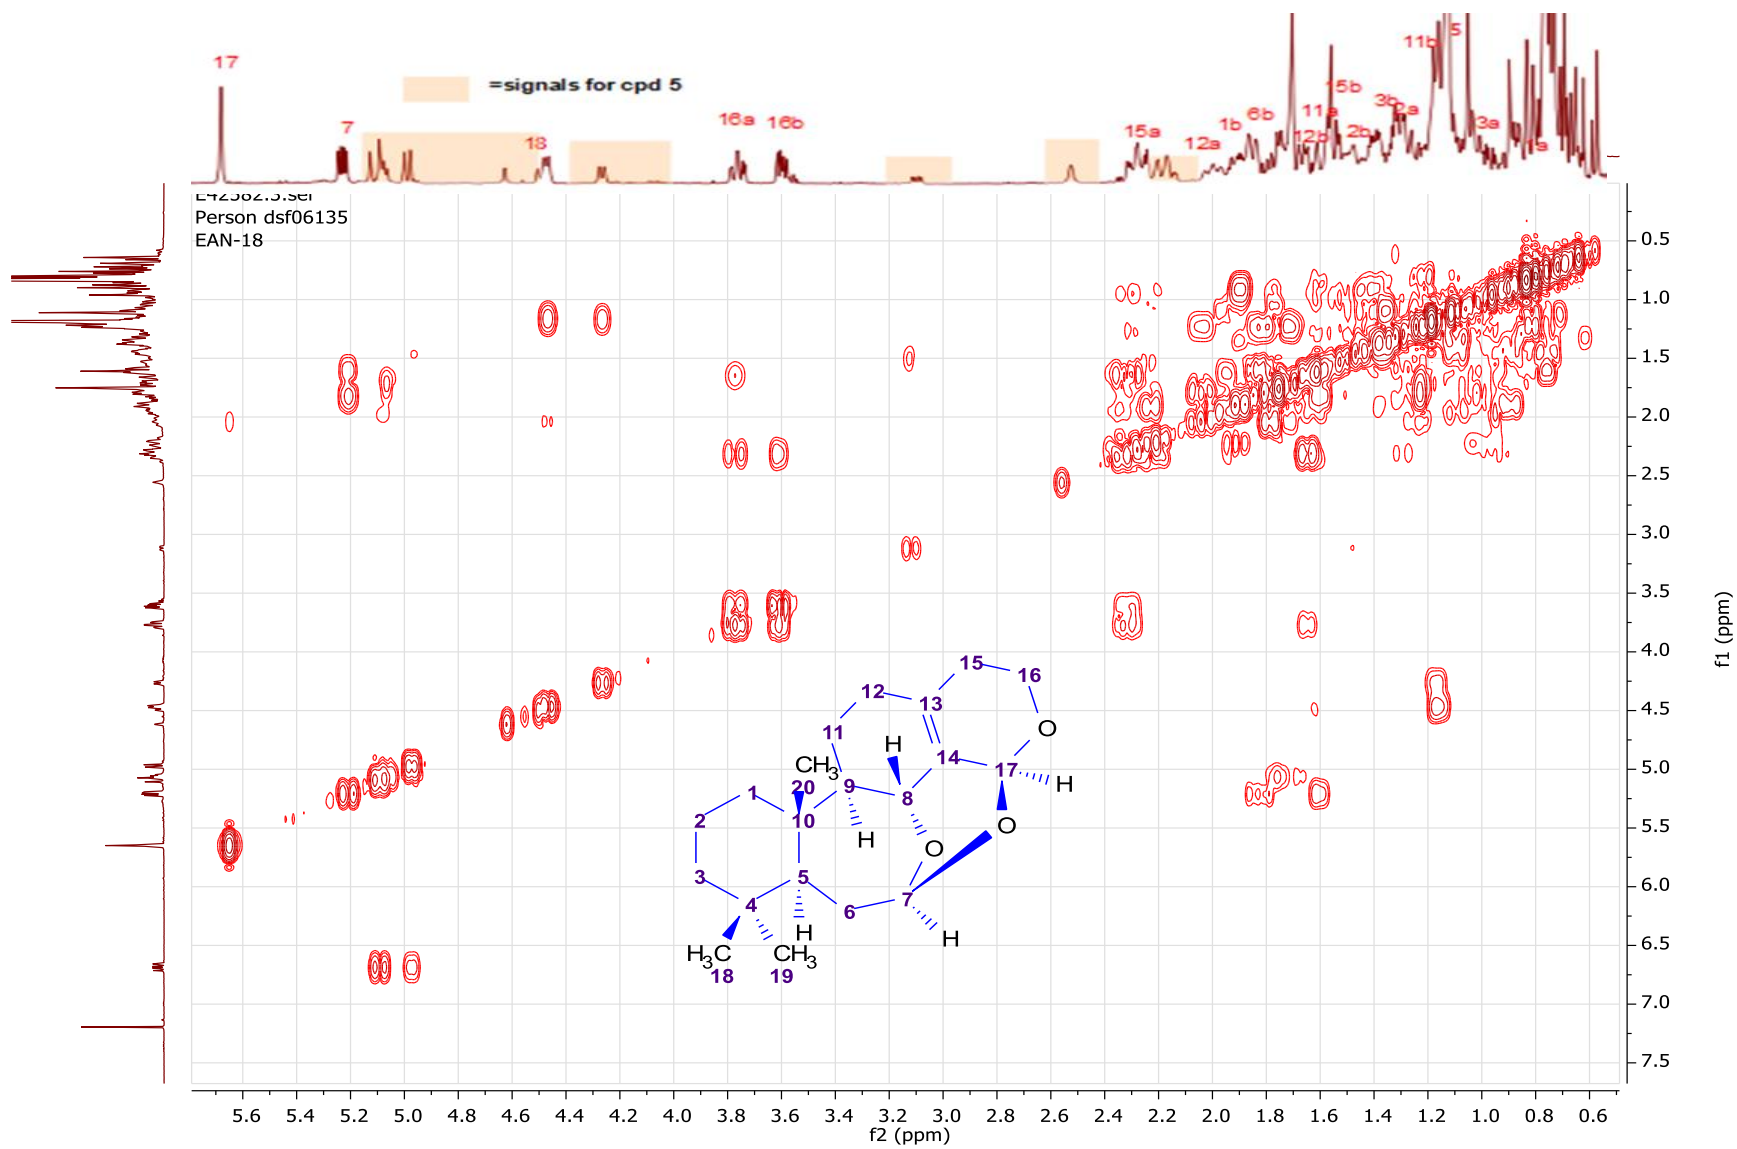

Figure S17: COSY Spectrum of compound 2

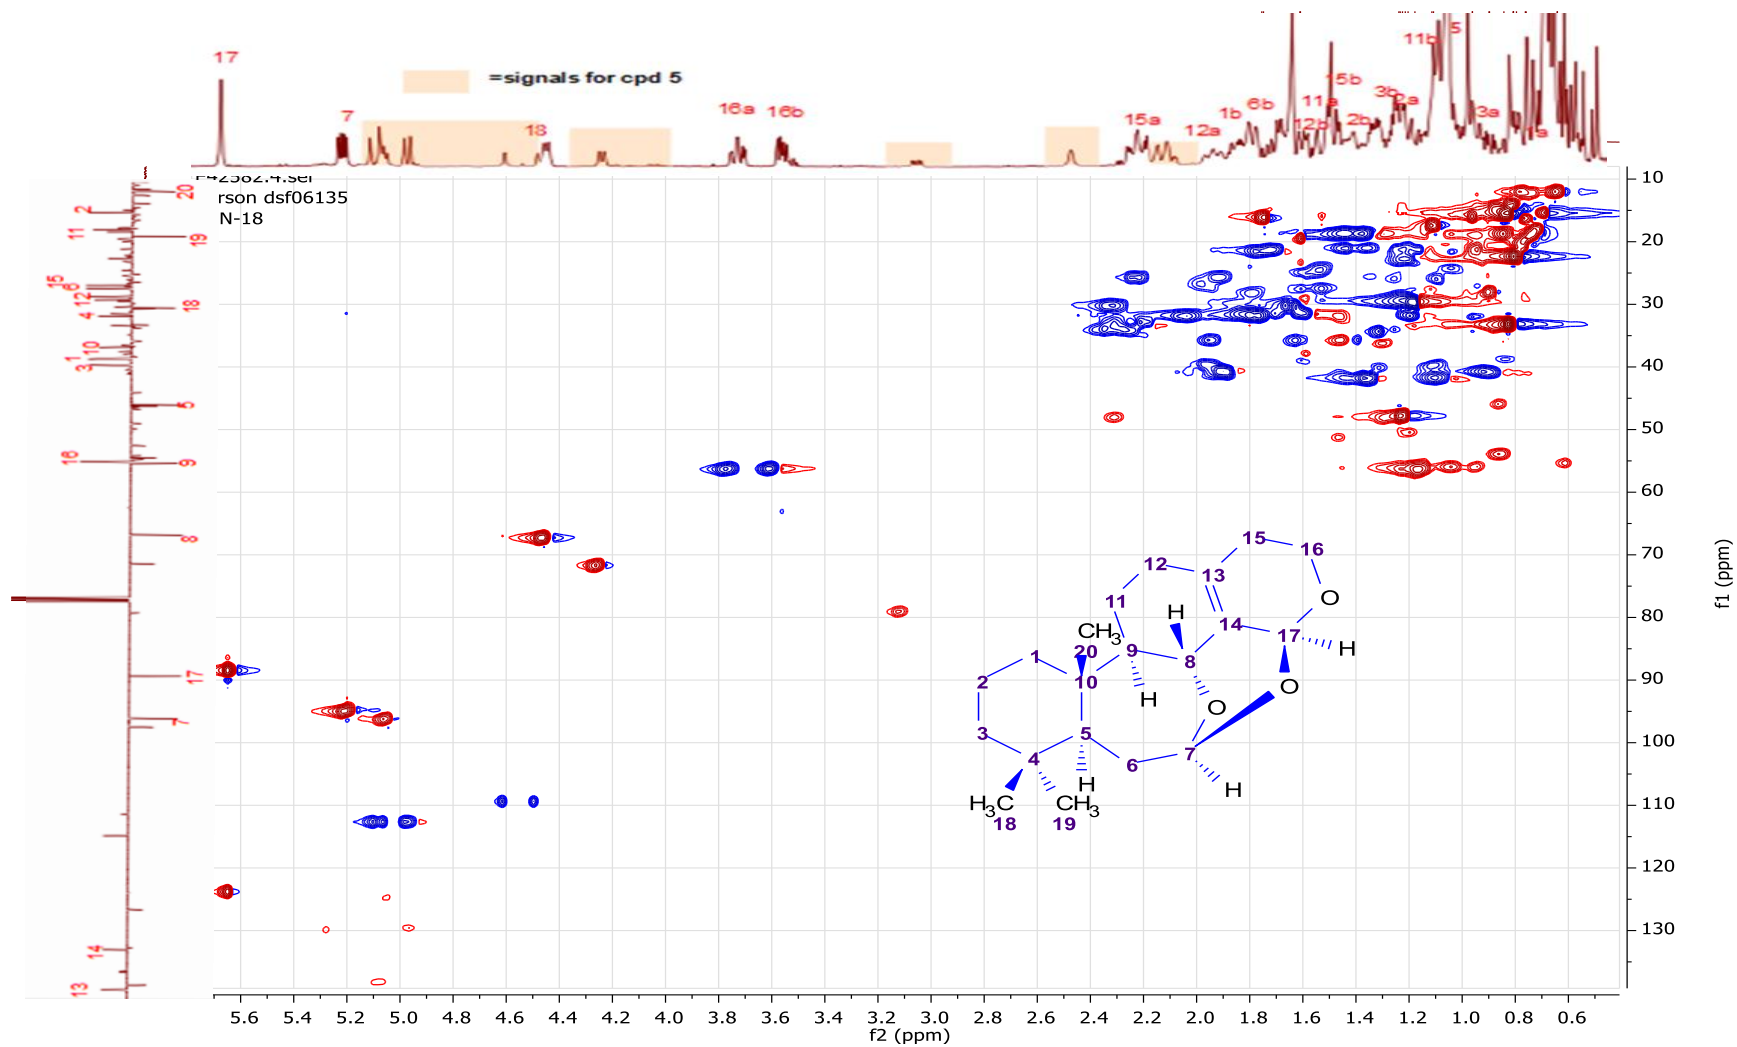

Figure S18: HSQC Spectrum of compound 2
